Perioperative oxygen concentration and postoperative organ damage in pediatric neurosurgery: a retrospective cohort study

Zhengfang Hu\*, Chenwei Wang, Huiwen Wang, Kangda Zhang

Department of Anesthesiology, Beijing Tiantan Hospital, Capital Medical University, Beijing, PR China

Address correspondence to:

Zhengfang Hu, MD, Department of Anesthesiology, Beijing Tiantan Hospital, Capital Medical University. No. 119, Southwest 4th Ring Road, Fengtai District, Beijing, PR China, 100070. Email: huzhengfang78@163.com. Tel.: +8610-59976658.

## Abstract

### Purpose

To investigate the correlation between perioperative oxygen concentration and postoperative organ damage and other adverse reactions in children undergoing neurosurgery.

### Materials and methods

This study was a single-center retrospective cohort study that included 512 children undergoing neurosurgery, aged  $\leq 14$  years old, and with an operative duration  $\geq 2$  hours who were transferred to the Postanesthesia Care Unit (PACU) of the Department of Anesthesiology, Beijing Tiantan Hospital, postoperatively during the period of October 2018 to September 2023. The medical records of the included children during hospitalization were meticulously reviewed and systematically collected through the Hospital Information System (His). The area under oxygen concentration-time curve  $AUC_{FIO_2}$  = the product of intraoperative oxygen concentration (percentage) and duration of anesthesia (minutes) was calculated, and then 512 children were divided into 3 groups according to the trichotomies of the  $AUC_{FIO_2}$  (Group1:  $AUC_{FIO_2} < 8720\% \text{ min}$ , Group2:  $8720\% \text{ min} \leq AUC_{FIO_2} \leq 13800\% \text{ min}$ , Group 3:  $AUC_{FIO_2} > 13800\% \text{ min}$ ) for inclusion in the data analysis.

### Results

**NOTE: This preprint reports new research that has not been certified by peer review and should not be used to guide clinical practice.**

The incidence of Emergency delirium was 24%, 26.9% and 19.4%, and the incidence of acute kidney injury was 0.6%, 2.3% and 0.6% in the three groups, respectively. There was no significant difference between the three groups ( $P > 0.05$ ). The incidence of postoperative pulmonary complications in the three groups was 20.6%, 20.8% and 31.5%, respectively, and there was a statistically significant difference between the three comparisons ( $P < 0.05$ ). There were no significant differences in nausea, vomiting, hypoxemia, VAS score and PACU residence time among the three groups during PACU ( $P > 0.05$ ), and there was a statistically significant differences between infections and hospital stay during hospitalization ( $P < 0.05$ ).

## Conclusions

Although the oxygen concentration  $AUC_{FIO_2}$  was not correlated with the occurrence of both postoperative AKI and ED, the longer the exposure time of conventional oxygen administration strategy, the higher the incidence of postoperative pulmonary complications and postoperative infections, and the longer the hospitalization time of children.

## Introduction

Almost all patients undergoing general anesthesia require routine intraoperative oxygen administration to counteract the diminished gas exchange induced by the various intraoperative anesthetics and analgesics and to ensure adequate oxygenation from the time of anesthesia intubation to the time of awakening from anesthesia. Children, however, are more likely to use high concentration of oxygen undergoing surgical treatment due to their smaller functional residual gas volumes and higher oxygen consumption<sup>[1]</sup>. However, oxygen is a double-edged sword, and in the 1990s, adverse outcomes of hyperoxygenation (supraphysiologic oxygen delivery) in critically ill neonates were first described<sup>[2,3]</sup>, culminating in national guidelines recommending the administration of room-air-concentrated oxygen for critically ill neonates<sup>[4]</sup>. These findings prompted further research to evaluate the potential adverse effects of hyperoxia on other populations and different organs. 2022, McIlroy's team<sup>[5]</sup>, found in a large, heterogeneous, and contemporary cohort of adult patients

undergoing a wide range of surgical procedures requiring general anesthesia, the incidence of postoperative AKI, myocardial injury, and lung injury was each higher in patients exposed to increased supraphysiological oxygen administration (defined as the area under the curve of the fraction of inspired oxygen above air during minutes when the hemoglobin oxygen saturation was greater than 92%) during surgery, indicating that the intensity and duration of exposure to supraphysiological oxygen delivery affects oxygen toxicity.

Given that children have distinct physiological responses compared to adults, which may alter their susceptibility to hypoxia or hyperoxia during surgical procedures. however, the existing literature primarily focuses on adult populations and the studies exploring the relationship between perioperative inspired oxygen concentration and the prognosis of children's surgeries are limited, leaving a significant gap in our understanding that the influence of intraoperative oxygen exposure time and intensity on various organs of pediatric patients.

The pediatric neurosurgical operations are characterized by long operation duration and prolonged anesthesia times, which can lead to varying levels of oxygenation throughout the procedure, so we propose to select children undergoing neurosurgical procedures as the research subjects and retrospectively observe the effects of the current clinical routine oxygen supply strategies on postoperative cardiac, pulmonary, and renal injuries and incidences of Emergency delirium during the awakening period in children. By systematically collecting data from medical records regarding intraoperative oxygen concentrations and durations alongside patient recovery metrics post-surgery—such as vital signs monitoring and organ function tests—we hope to elucidate potential correlations. Ultimately, enhancing our understanding in this area may contribute significantly toward improving overall patient safety and outcomes in pediatric neurosurgery.

## **Methods**

### **Setting, patient population, and study design**

This is a retrospective observational cohort study conducted from October 2018 to

September 2023 approved by the ethics committee of the Beijing Tiantan Hospital (KY-2024-037), Capital Medical University. The children who had neurosurgery and were sent to the PACU of the Anesthesia Department of Beijing Tiantan Hospital for after-surgery care were retrieved and analyzed. The 512 children data included in the study were based on the following inclusion criteria of: ① age 14 or younger; ② general anesthesia; ③ the types of surgeries were intracranial tumor removal, cerebrovascular malformation removal and spinal cord and spinal column tumor removal; ④ the surgery lasted for 2 hours or longer. The exclusion criteria were: ① missing data in the medical records; ② SPO<sub>2</sub> was less than 90% for more than 3 minutes during the operation; ③ having another surgery within 90 days.

## **Clinical protocols**

### **Patient and public involvement**

This was a de-identified chart review and as such no patients were directly involved.

### **Data collection**

The medical records of the included children during hospitalization were meticulously reviewed and systematically collected through the Hospital Information System (His). The baseline data encompassed a variety of demographic and clinical parameters, including age, gender, ASA classification, body mass, anesthetic medication usage patterns, duration of anesthesia procedures, intraoperative oxygen inhalation concentration levels, postoperative diagnosis details, and surgical approach utilized. Several vital signs and recovery metrics were documented including blood pressure, heart rate, oxygen saturation levels monitored throughout the procedure and recovery phase, pain scores assessed using standardized scales at various intervals post-surgery.

Furthermore, specific adverse events such as infections—both wound infections confirmed by bacterial culture results obtained from samples taken around the surgical site—and intracranial infections diagnosed through lumbar puncture alongside cerebrospinal fluid examination findings—were carefully recorded. Postoperative pulmonary complications were identified based on diagnostic imaging reports from chest X-rays or chest CT after surgery or changes in lung markings

compared to preoperative findings within 72 hours [8]. Changes in renal function were evaluated by calculating the difference between the first postoperative serum creatinine value and the last preoperative serum creatinine value, Postoperative AKI was defined as the difference between the first serum creatinine value and the last preoperative serum creatinine value  $\geq 0.3$  mg/dl within 72h after surgery [7].

Additionally, attention was given to monitoring for emergence delirium—a condition characterized by confusion or agitation upon waking from anesthesia—which was specifically tracked within the Post-Anesthesia Care Unit (PACU) throughout each child's postoperative hospital stay. To assess emergence delirium quantitatively among pediatric patients in PACU settings effectively, healthcare professionals employed the Pediatric Anesthesia Emergence Delirium (PAED) scale. This validated tool evaluates behaviors exhibited by children after surgery across five distinct categories: awareness level upon awakening from anesthesia; ability to engage with caregivers; emotional state; motor activity level; and overall behavior quality postoperatively. Each behavior was rated on a five-level scale ranging from 0 (indicating no symptoms) to 4 (indicating severe symptoms). The total score derived from these evaluations could reach a maximum of 20 points; an ED diagnosis would be established when a child's total PAED score met or exceeded 12 points [6].

Based on McIlroy's study, the area under the oxygen concentration-time curve ( $AUC_{FIO_2}$ ) was first calculated as the product of the intraoperative oxygen concentration (expressed in percentage) and the duration of anesthesia (measured in minutes). And then according to the tertiles of  $AUC_{FIO_2}$  values, 512 children were classified into 3 groups: Group 1 consisted of those with an  $AUC_{FIO_2}$  value  $< 8720\%$  min, Group 2 included participants whose  $8720\% \text{ min} \leq AUC_{FIO_2} \leq 13800\% \text{ min}$ , Group 3 encompassed individuals with an  $AUC_{FIO_2} \geq 13800\% \text{ min}$  for data analysis.

### **Definitions**

The primary outcome indicators were the incidence of ED in PACU, the incidence of postoperative Acute Kidney Injury (AKI), and the incidence of postoperative

pulmonary complications in the three groups. Secondary outcome indicators were nausea, vomiting, Visual Analogue Scale(VAS) pain score and hypoxemia in the PACU, infection and length of stay(LOS)during the hospitalization. Hypoxemia during PACU was defined as SpO<sub>2</sub> < 90%.

### Statistical methods

Multiple interpolation was performed for variables with missing proportions of less than 5%, and all continuous variables were first tested for normality, with non-normally distributed measurements expressed as medians (quartiles) and counts expressed as cases (percentage). Kruskal-Wallis rank sum test was used for intergroup comparisons of quantitative data, and chi-square test was used for categorical data. In addition, to further explore the relationship between AUCFiO<sub>2</sub> and outcomes, variables with P < 0.1 in univariate analysis were included in the multivariate Logistic regression model. A two-sided P < 0.05 was considered statistically significant, and all statistical analyses were completed on R 4.3.3 software.

## Results

### Baseline characteristics and surgical factors in three groups of children

The baseline characteristics and surgical of the 512 children are shown in Table 1. There were no statistically significant differences in baseline data such as gender (P = 0.484) and intraoperative oxygen saturation among (P = 0.249) the three groups, while there were statistically significant differences in age, body mass index, duration of surgery, type of surgery, intraoperative blood loss, colloid infusion, erythrocyte transfusion, plasma transfusion, preoperative Hb and preoperative serum creatinine value among the three groups (P = 0.001), which was considered to be related to the subgroups.

|                               | Group1                                                 | Group2                                                     | Group3                                                  | P value |
|-------------------------------|--------------------------------------------------------|------------------------------------------------------------|---------------------------------------------------------|---------|
|                               | AUC <sub>FIO<sub>2</sub></sub> <<br>8720% min<br>n=171 | AUC <sub>FIO<sub>2</sub></sub> 8720<br>-13800%min<br>n=171 | AUC <sub>FIO<sub>2</sub></sub> ><br>13800% min<br>n=170 |         |
| <b>Characteristic factors</b> |                                                        |                                                            |                                                         |         |

|                                                    |                  |                    |                      |       |
|----------------------------------------------------|------------------|--------------------|----------------------|-------|
| Male[n(%)]                                         | 100(58.5)        | 97(56.7)           | 107(62.9)            | 0.484 |
| Age/a                                              | 9(6,10)          | 8(6,11)            | 7(5,10)              | 0.042 |
| Body mass index                                    | 17.7(15.3,21.2)  | 16.6(14.9,20.1)    | 16.6(15.1,18.9)      | 0.001 |
| <b>Surgery characteristics</b>                     |                  |                    |                      |       |
| Duration of Surgery (min)                          | 110(65,133)      | 197(180,223)       | 300(263,330)         | 0.001 |
| <b>Disease types[n(%)]</b>                         |                  |                    |                      | 0.001 |
| Intracranial tumors                                | 123(71.9)        | 135(78.9)          | 152(89.4)            |       |
| Vascular Lesion                                    | 30(17.5)         | 26(15.2)           | 11(6.5)              |       |
| Spinal tumors                                      | 17(9.9)          | 10 (5.8)           | 7 (4.1)              |       |
| <b>Bleed loss(ml)</b>                              | 30(20,50)        | 100(50,150)        | 115(100,250)         | 0.001 |
| <b>Crystalloid (ml)</b>                            | 0(0,0)           | 100(0,300)         | 200(0,300)           | 0.001 |
| <b>RBC transfusion</b>                             | 0(0,0)           | 0(0,0)             | 0(0,130)             | 0.001 |
| <b>FFP transfusion</b>                             | 0(0,0)           | 0(0,0)             | 0(0,0)               | 0.001 |
| <b>Baseline (preoperative) laboratory data</b>     |                  |                    |                      |       |
| Hemoglobin (g/dl)                                  | 132(125, 139)    | 133(122, 141)      | 128(116, 135)        | 0.001 |
| Creatinine (mg/dl)                                 | 0.4(0.33, 0.48)  | 0.4(0.33, 0.47)    | 0.39(0.31,0.46)      | 0.001 |
| <b>Intraoperative oxygenation —FIO2 median (%)</b> |                  |                    |                      |       |
| FIO2 median (%)                                    | 60(50,60)        | 60(50,60)          | 60(50,60)            | 0.001 |
| FIO2, area under the curve(%min)                   | 6240 (3900,7560) | 11400 (9900,12600) | 16700 (15247, 19830) | 0.001 |
| SpO2 mean (%)                                      | 99(98, 100)      | 99(98, 100)        | 99(98,100)           | 0.249 |

**Table 1: Comparison of baseline characteristics and surgical factors between the three groups [M(P25,P75 )]**

**Comparison of primary and secondary outcomes among the three groups**

The primary and secondary outcomes as shown in Table 2. The incidence of ED in PACU was 24%, 26.9%, and 19.4% respectively and there was no significant difference among the three groups ( $p=0.258$ ). The incidence of AKI was 0.6%, 2.3%, and 0.6%, respectively and also there was no significant difference among the three groups ( $p=0.221$ ). The incidence of postoperative pulmonary complications was 20.6%, 20.8%, and 31.5% in the three groups, respectively, and there was a statistically significant difference between the three comparisons ( $P=0.028$ ). There was no statistical difference in the incidence of nausea ( $P=0.579$ ), vomiting ( $P=0.749$ ), hypoxemia ( $P=0.606$ ), VAS score ( $P=0.553$ ), and Resident time in PACU ( $P=0.195$ ) among the three groups, but there was a statistically significant difference in the comparison of infections ( $P=0.001$ ), extubation time ( $P=0.012$ ) and hospital stay during hospitalization ( $P=0.001$ ).

|                                      | Group1<br>AUC <sub>FIO2</sub> <<br>8720% min<br>n=171 | Group2<br>AUC <sub>FIO2</sub> 8720<br>-13800%min<br>n=171 | Group3<br>AUC <sub>FIO2</sub> ><br>13800% min<br>n=170 | P value |
|--------------------------------------|-------------------------------------------------------|-----------------------------------------------------------|--------------------------------------------------------|---------|
| <b>Primary Outcome</b>               |                                                       |                                                           |                                                        |         |
| ED [n(%)]                            | 41(24.0)                                              | 46(26.9)                                                  | 33(19.4)                                               | 0.258   |
| AKI [n(%)]                           | 1(0.6)                                                | 4(2.3)                                                    | 1(0.6)                                                 | 0.221   |
| PPC[n(%)]                            | 35(20.6)                                              | 35(20.8)                                                  | 53((31.5)                                              | 0.028   |
| <b>Secondary outcome</b>             |                                                       |                                                           |                                                        |         |
| Infection [n(%)]                     |                                                       |                                                           |                                                        | 0.001   |
| Intracranial Infection               | 21(12.3)                                              | 28(16.4)                                                  | 57(33.5)                                               |         |
| Wound Infection                      | 3(1.8)                                                | 5(2.9)                                                    | 6(3.5)                                                 |         |
| Absorption Fever                     | 20(11.7)                                              | 35(20.5)                                                  | 34(20.0)                                               |         |
| Extubation Time                      | 13(9,20)                                              | 13(10,19)                                                 | 15(10,23.25)                                           | 0.012   |
| LOS                                  | 10(7,14)                                              | 13(10,16)                                                 | 16(13,21.25)                                           | 0.001   |
| <b>Postanesthesia Care Unit data</b> |                                                       |                                                           |                                                        |         |
| Resident time (min)                  | 75(60,100)                                            | 75(60,100)                                                | 75(60,90)                                              | 0.195   |



|                              |           |          |          |       |
|------------------------------|-----------|----------|----------|-------|
| Vomit[n(%)]                  | 48(9.4)   | 14(8.2)  | 15(8.8)  | 0.579 |
| Nausea[n(%)]                 | 16(9.4)   | 17(9.9)  | 20(11.8) | 0.749 |
| Hypoxemia[n(%)]              | 2(1.2)    | 3(1.8)   | 1(0.6)   | 0.606 |
| VAS score                    |           |          |          | 0.553 |
| Unmeasured or missing [n(%)] | 25(14.6)  | 25(14.6) | 37(21.8) |       |
| 0 Point                      | 74 (43.3) | 74(43.3) | 69(40.6) |       |
| 1point                       | 27(15.8)  | 30(17.5) | 21(12.4) |       |
| 2 point                      | 27(15.8)  | 24(14.0) | 30(17.6) |       |
| 3 point                      | 18(10.5)  | 18(10.5) | 13(7.6)  |       |

**Table 2 : Comparison of Primary and Secondary outcome between the three groups**

**Correlation analysis between  $AUC_{FIO_2}$  and primary outcome:**

Univariate Logistic regression showed that  $AUC_{FIO_2}$  was negatively correlated with the development of postoperative AKI, but not correlated with ED. However, after adjusting for variables of baseline imbalance, multivariate Logistic regression showed that  $AUC_{FIO_2}$  was not associated with the occurrence of postoperative AKI or ED (as shown Table 3).

| Outcomes                 | $AUC_{FIO_2}$ (OR, 95%CI) |                                             |                     |
|--------------------------|---------------------------|---------------------------------------------|---------------------|
|                          | $AUC < 8720\%$ min        | $8720\%$ min<br>$\leq AUC \leq 13800\%$ min | $AUC > 13800\%$ min |
| <b>Postoperative AKI</b> |                           |                                             |                     |
| One-factor model         | 1.00 (Reference)          | 0.50 (0.32 ~ 0.78)                          | 0.34 (0.22 ~ 0.53)  |
| Multi-factor model*      | 1.00 (Reference)          | 0.58 (0.32 ~ 1.07)                          | 0.60 (0.23 ~ 1.54)  |
| <b>ED</b>                |                           |                                             |                     |
| One-factor               | 1.00 (Reference)          | 1.17 (0.72 ~ 1.90)                          | 0.76 (0.46 ~ 1.28)  |

model

Multi-factor      1.00 (Reference)      1.40 (0.71 ~ 2.74)      1.52 (0.51 ~ 4.52)

model\*

---

Table 3 Correlation analysis of  $AUC_{FIO_2}$  and postoperative AKI and ED

\* Correcting factors: Postoperative infection、 Operation site、 Duration of Surgery、 Extubation time、 Hemoglobin、 Body mass index、 Age、 Blood loss、 Crystalloid、 RBC transfusion、 FFP transfusion

# Correcting factors: Postoperative infection, Operation site, Duration of Surgery, Extubation time, Hemoglobin, Body mass index, Age, Blood loss, Crystalloid、 RBC transfusion、 FFP transfusion、 AKI

## Discussion

This study is a retrospective cohort investigation aimed at exploring the influences of intraoperative oxygen exposure duration and intensity on the postoperative conditions of organs such as the brain, lungs, and kidneys in children undergoing neurosurgical procedures. The research results revealed that although the oxygen concentration  $AUC_{FIO_2}$  had no correlation with the occurrence of postoperative AKI and ED, the longer the exposure time of the conventional oxygen supply strategy, the higher the incidence of postoperative pulmonary complications and postoperative infections in children, and the significantly longer the hospital stay.

Exposure to oxygen concentrations above the normal level might lead to an increase in the production of reactive oxygen metabolites such as hydrogen peroxide, nitric oxide, superoxide, and reactive hydroxyl groups, disrupting the antioxidant balance and thereby promoting lipid peroxidation, impaired protein synthesis, inactivation of enzymes and nucleic acids, DNA mutations, disrupted mitochondrial calcium homeostasis, and increased membrane permeability. It has been regarded as one of the causes of lung, myocardial, and kidney injuries [9-11]. The VISION study suggested that for every 10% increase in intraoperative oxygen inhalation concentration, the risk of postoperative cardiac injury increased by 1.17 times [12]. A retrospective study reported that intraoperative hyperoxia was closely related to acute

kidney injury after cardiac surgery<sup>[13]</sup>. Multiple studies have reported that intraoperative hyperoxic cerebral reperfusion injury significantly increased the incidence of early postoperative POCD and postoperative delirium <sup>[14,15]</sup>. Due to the underdeveloped ROS scavenging mechanism, neonates and children seem to be more susceptible to the multisystem effects of hyperoxia <sup>[16-18]</sup>. The existing literature observing the relationship between hyperoxemia in children and prognosis is limited and mainly observational. In a Meta-analysis evaluating the relationship between hyperoxemia and mortality in critically ill children, among the 12 studies included by the authors, 7 studies reported that hyperoxemia was closely related to an increased mortality rate in children, while the other 5 studies did not find this association, but their sample sizes were relatively small. Several studies found that this association still persisted after adjusting for demographic characteristics and disease severity, further confirming the potential harmful effects of hyperoxemia. However, the exact threshold at which hyperoxemia becomes harmful remains unclear. Therefore, the authors recommend that clinicians should be rational and cautious when using oxygen therapy for critically ill children <sup>[19]</sup>. In a prospective observational study by Ayten et al., children undergoing corrective surgery for coarctation of the aorta were used as the observation subjects to compare the differences in postoperative related complications, ICU stay time, and hospital stay time between children who received 80% and 60% oxygen during anesthesia induction. The results showed that although no related complications were recorded in both groups of children after surgery, the ICU stay and hospitalization time of children in the hyperoxia group were significantly longer than those in the hypoxia group <sup>[20]</sup>.

The results of our retrospective study indicated that the median FiO<sub>2</sub> during surgery in 512 children was 60% [50%, 60%], and the median AUC<sub>FiO<sub>2</sub></sub> was 11,400% min [7,515% min, 15,247% min]; the median FiO<sub>2</sub> during surgery in the David team was 54% [47.5%, 60%], and the median AUC<sub>FiO<sub>2</sub></sub> was 7,951% min [5,870% min, 11,107% min]. Compared with the David team, the median AUC<sub>FiO<sub>2</sub></sub> in our study was significantly larger, which was related to our selection of children undergoing neurosurgical procedures as the observation subjects. The surgery time was long, so

the intensity of supra-physiological oxygen exposure ( $AUC_{FiO_2}$ ) was high. Different from the research results of the David team, we did not observe statistically significant differences in the incidences of postoperative acute kidney injury and postoperative ED among the three groups of children, which might be related to the small functional residual capacity and high oxygen consumption in children [17]. However, the three groups of children had high incidences of postoperative pulmonary complications and postoperative infections, prolonged hospital stay, and we believe that the reasons for this are partly related to the condition of the children and the other possible reason may be consistent with the assumption of the David team, that exposure intensity and duration affect oxygen toxicity, assuming that exposure intensity and duration are biologically interchangeable, and there is a connection between excess physiological oxygen exposure duration and organ damage. High fractional inspired oxygen, especially  $\geq 60\%$ , leads to excessive production of reactive oxygen species in alveolar mitochondria, thereby destroying the normal clearance mechanism and causing cell death [21,22].

This study has certain limitations: Firstly, this is a single-center retrospective study with inherent limitations such as case selection bias. Additionally, only 1% of the included children had troponin testing after surgery. Therefore, this indicator was excluded and not subjected to statistical analysis. With a larger sample size, perhaps positive findings could have been obtained. Thirdly, postoperative brain tissue resection or injury might affect the early mental state after neurosurgery. Given the ethical limitations of conducting prospective randomized controlled clinical studies in pediatric patients, it is unlikely that the question of the appropriate oxygen concentration during surgery for children undergoing surgery can be directly answered in a prospective randomized controlled study. Therefore, the conclusions of this study may have certain reference value for the intraoperative respiratory management of children undergoing long surgeries. Compared with the conventional oxygen supply strategy, large-scale trials evaluating conservative oxygen supply strategies and targets are more likely to be supported.

## **Conclusion**

We found that although the oxygen concentration  $AUC_{FIO_2}$  was not correlated with the occurrence of both postoperative AKI and ED, but the longer the exposure time of conventional oxygen administration strategy, the higher the incidence of postoperative pulmonary complications and postoperative infections, and the longer the hospitalization time of children. This suggests that more stringent oxygen administration strategy and respiratory management measures should be adopted during prolonged pediatric surgery to reduce respiratory related complications and length of hospital stay.

### **Supporting information**

#### **References**

1. Nimmagadda U, Salem MR, Crystal GJ. Preoxygenation: physiologic basis, benefits, and potential risks. *Anesth Analg.* 2017;124:507–17. PMID: 28099321
2. Ramji S, Ahuja S, Thirupuram S, Rootwelt T, Rooth G, Saugstad OD. Resuscitation of asphyxic newborn infants with room air or 100% oxygen. *Pediatr Res.* 1993 Dec;34(6):809-12. doi: 10.1203/00006450-199312000-00023. PMID: 8108199
3. Saugstad OD. Mechanisms of tissue injury by oxygen radicals: implications for neonatal disease. *Acta Paediatr.* 1996; 85:1– 4. PMID:8834970
4. Kattwinkel J, Perlman JM, Aziz K, Colby C, Fairchild K, Gallagher J, et al. Part 15: neonatal resuscitation: 2010 American Heart Association Guidelines for Cardiopulmonary Resuscitation and Emergency Cardiovascular Care. *Circulation.* 2010 Nov 2;122(18 Suppl 3):S909-19. PMID: 20956231
5. McIlroy DR, Shotwell MS, Lopez MG, Vaughn MT, Olsen JS, Hennessy C, et al. Multicenter Perioperative Outcomes Group. Oxygen administration during surgery and postoperative organ injury: observational cohort study. *BMJ.* 2022 Nov 30;379:e070941. PMID: 36450405
6. Somaini M, Engelhardt T, Fumagalli R, Ingelmo PM. Emergence delirium or pain after anaesthesia--how to distinguish between the two in young children: a retrospective analysis of observational studies. *Br J Anaesth.* 2016 Mar;116(3):377-83. PMID: 26865130

7. Morgan C, Forest E, Ulrich E, Sutherland S. Pediatric acute kidney injury and adverse health outcomes: using a foundational framework to evaluate a causal link. *Pediatr Nephrol.* 2024 Dec;39(12):3425-3438. PMID: 38951220
8. Jammer I, Wickboldt N, Sander M, Smith A, Schultz MJ, Pelosi P, et al. European Society of Anaesthesiology (ESA) and the European Society of Intensive Care Medicine (ESICM); European Society of Anaesthesiology; European Society of Intensive Care Medicine. Standards for definitions and use of outcome measures for clinical effectiveness research in perioperative medicine: European Perioperative Clinical Outcome (EPCO) definitions: a statement from the ESA-ESICM joint taskforce on perioperative outcome measures. *Eur J Anaesthesiol.* 2015 Feb;32(2):88-105. PMID: 25058504
9. Schwarte LA, Schober P, Loer SA. Benefits and harms of increased inspiratory oxygen concentrations. *Curr Opin Anaesthesiol.* 2019 Dec;32(6):783-791. PMID: 31464698
10. Li TM, Liu DY. Mechanism of Neonatal Intestinal Injury Induced by Hyperoxia Therapy. *J Immunol Res.* 2022 Jan 12;2022:2316368. PMID: 35071607
11. Weenink RP, de Jonge SW, van Hulst RA, Wingelaar TT, van Ooij PAM, Immink RV, et al. Perioperative Hyperoxyphobia: Justified or Not? Benefits and Harms of Hyperoxia during Surgery. *J Clin Med.* 2020 Feb 28;9(3):642. PMID: 32121051
12. Pedersen SS, Holse C, Mathar CE, Chan MTV, Sessler DI, Liu Y, et al. Intraoperative Inspiratory Oxygen Fraction and Myocardial Injury After Noncardiac Surgery: Results From an International Observational Study in Relation to Recent Controlled Trials. *Anesth Analg.* 2022 Nov 1;135(5):1021-30. PMID: 35417425
13. Bae J, Kim J, Lee S, Ju JW, Cho YJ, Kim TK, et al. Association Between Intraoperative Hyperoxia and Acute Kidney Injury After Cardiac Surgery: A Retrospective Observational Study. *J Cardiothorac Vasc Anesth.* 2021 Aug;35(8):2405-14. PMID: 33342731
14. Shaefi S, Shankar P, Mueller AL, O'Gara BP, Spear K, Khabbaz KR, et al.

- Intraoperative Oxygen Concentration and Neurocognition after Cardiac Surgery. *Anesthesiology*. 2021 Feb 1;134(2):189-201. PMID: 33331902
15. Lin X, Wang P, Liu DW, Guo YW, Xie CH, Wang B, et al. Intraoperative Oxygen Concentration and Postoperative Delirium After Laparoscopic Gastric and Colorectal Malignancies Surgery: A Randomized, Double-Blind, Controlled Trial. *Clin Interv Aging*. 2021 Jun 15;16:1085-93. PMID: 34163152
  16. Vento M, Moro M, Escrig R, Arruza L, Villar G, Izquierdo I, et al. Preterm resuscitation with low oxygen causes less oxidative stress, inflammation, and chronic lung disease. *Pediatrics*. 2009 Sep;124(3):e439-49. PMID: 19661049
  17. Lorente-Pozo S, Parra-Llorca A, Lara-Cantón I, Solaz A, García-Jiménez JL, Pallardó FV, et al. Oxygen in the neonatal period: Oxidative stress, oxygen load and epigenetic changes. *Semin Fetal Neonatal Med*. 2020 Apr;25(2):101090. PMID: 32014366
  18. Li TM, Liu DY. Mechanism of Neonatal Intestinal Injury Induced by Hyperoxia Therapy. *J Immunol Res*. 2022 Jan 12;2022:2316368. PMID: 35071607
  19. Pelletier JH, Ramgopal S, Horvat CM. Hyperoxemia Is Associated With Mortality in Critically Ill Children. *Front Med (Lausanne)*. 2021 Jun 7; 8:675293. PMID: 34164417
  20. Saracoglu A, Zengin SU, Ozturk N, Niftaliyev S, Harman F, Aykac Z. The outcomes of using high oxygen concentration in pediatric patients. *J Clin Monit Comput*. 2022 Oct;36(5):1341-46. PMID: 34705168
  21. Tiboldi A, Hunyadi-Gulyas E, Wohlrab P, Schmid JA, Markstaller K, Klein KU, et al. Effects of Hyperoxia and Hyperoxic Oscillations on the Proteome of Murine Lung Microvascular Endothelium. *Antioxidants (Basel)*. 2022 Nov 28;11(12):2349. PMID: 36552557
  22. Kallet RH, Matthay MA. Hyperoxic acute lung injury. *Respir Care*. 2013 ;58(1):123-41. PMID: 23271823

|                                                               | Group1<br>AUC <sub>FIO2</sub> <<br>8720% min<br>n=171 | Group2<br>AUC <sub>FIO2</sub> 8720<br>-13800%min<br>n=171 | Group3<br>AUC <sub>FIO2</sub> ><br>13800% min<br>n=170 | P value |
|---------------------------------------------------------------|-------------------------------------------------------|-----------------------------------------------------------|--------------------------------------------------------|---------|
| <b>Characteristic factors</b>                                 |                                                       |                                                           |                                                        |         |
| Male[n(%)]                                                    | 100(58.5)                                             | 97(56.7)                                                  | 107(62.9)                                              | 0.484   |
| Age/a                                                         | 9(6,10)                                               | 8(6,11)                                                   | 7(5,10)                                                | 0.042   |
| Body mass index                                               | 17.7(15.3,21.2)                                       | 16.6(14.9,20.1)                                           | 16.6(15.1,18.9)                                        | 0.001   |
| <b>Surgery characteristics</b>                                |                                                       |                                                           |                                                        |         |
| <b>Duration of Surgery (min)</b>                              | 110(65,133)                                           | 197(180,223)                                              | 300(263,330)                                           | 0.001   |
| <b>Disease types[n(%)]</b>                                    |                                                       |                                                           |                                                        | 0.001   |
| Intracranial tumors                                           | 123(71.9)                                             | 135(78.9)                                                 | 152(89.4)                                              |         |
| Vascular Lesion                                               | 30(17.5)                                              | 26(15.2)                                                  | 11(6.5)                                                |         |
| Spinal tumors                                                 | 17(9.9)                                               | 10 (5.8)                                                  | 7 (4.1)                                                |         |
| <b>Blood loss(ml)</b>                                         | 30(20,50)                                             | 100(50,150)                                               | 115(100,250)                                           | 0.001   |
| <b>Crystalloid (ml)</b>                                       | 0(0,0)                                                | 100(0,300)                                                | 200(0,300)                                             | 0.001   |
| <b>RBC transfusion</b>                                        | 0(0,0)                                                | 0(0,0)                                                    | 0(0,130)                                               | 0.001   |
| <b>FFP transfusion</b>                                        | 0(0,0)                                                | 0(0,0)                                                    | 0(0,0)                                                 | 0.001   |
| <b>Baseline (preoperative) laboratory data</b>                |                                                       |                                                           |                                                        |         |
| Hemoglobin (g/dl)                                             | 132(125, 139)                                         | 133(122, 141)                                             | 128(116, 135)                                          | 0.001   |
| Creatinine (mg/dl)                                            | 0.4(0.33, 0.48)                                       | 0.4(0.33, 0.47)                                           | 0.39(0.31,0.46)                                        | 0.001   |
| <b>Intraoperative oxygenation —Fio<sub>2</sub> median (%)</b> |                                                       |                                                           |                                                        |         |
| FIO <sub>2</sub> median (%)                                   | 60(50,60)                                             | 60(50,60)                                                 | 60(50,60)                                              | 0.001   |
| FIO <sub>2</sub> , area under the curve* (%)                  | 6240(3900,7560)                                       | 11400(9900,12600)                                         | 16700(15247 , 19830)                                   | 0.001   |

medRxiv preprint doi: <https://doi.org/10.1101/2024.11.12.24317154>; this version posted November 13, 2024. The copyright holder for this preprint (which was not certified by peer review) is the author/funder, who has granted medRxiv a license to display the preprint in perpetuity. It is made available under a CC-BY 4.0 International license.



|               |             |             |            |       |
|---------------|-------------|-------------|------------|-------|
| min)          |             |             |            |       |
| SpO2 mean (%) | 99(98, 100) | 99(98, 100) | 99(98,100) | 0.249 |

Table 1 : Comparison of baseline characteristics and surgical factors between the three groups [M(P25,P75 )]

|                                      | Group1<br>AUC <sub>FIO2</sub> <<br>8720% min<br>n=171 | Group2<br>AUC <sub>FIO2</sub> 8720<br>-13800%min<br>n=171 | Group3<br>AUC <sub>FIO2</sub> ><br>13800% min<br>n=170 | P value |
|--------------------------------------|-------------------------------------------------------|-----------------------------------------------------------|--------------------------------------------------------|---------|
| <b>Primary Outcome</b>               |                                                       |                                                           |                                                        |         |
| ED [n(%)]                            | 41(24.0)                                              | 46(26.9)                                                  | 33(19.4)                                               | 0.258   |
| AKI [n(%)]                           | 1(0.6)                                                | 4(2.3)                                                    | 1(0.6)                                                 | 0.221   |
| PPC[n(%)]                            | 35(20.6)                                              | 35(20.8)                                                  | 53((31.5)                                              | 0.028   |
| <b>Secondary outcome</b>             |                                                       |                                                           |                                                        |         |
| Infection [n(%)]                     |                                                       |                                                           |                                                        | 0.001   |
| Intracranial Infection               | 21(12.3)                                              | 28(16.4)                                                  | 57(33.5)                                               |         |
| Wound Infection                      | 3(1.8)                                                | 5(2.9)                                                    | 6(3.5)                                                 |         |
| Absorption Fever                     | 20(11.7)                                              | 35(20.5)                                                  | 34(20.0)                                               |         |
| Extubation Time                      | 13(9,20)                                              | 13(10,19)                                                 | 15(10,23.25)                                           | 0.012   |
| LOS                                  | 10(7,14)                                              | 13(10,16)                                                 | 16(13,21.25)                                           | 0.001   |
| <b>Postanesthesia Care Unit data</b> |                                                       |                                                           |                                                        |         |
| Resident time (min)                  | 75(60,100)                                            | 75(60,100)                                                | 75(60,90)                                              | 0.195   |
| Vomit[n(%)]                          | 48(9.4)                                               | 14(8.2)                                                   | 15(8.8)                                                | 0.579   |
| Nausca[n(%)]                         | 16(9.4)                                               | 17(9.9)                                                   | 20(11.8)                                               | 0.749   |
| Hypoxemia[n(%)]                      | 2(1.2)                                                | 3(1.8)                                                    | 1(0.6)                                                 | 0.606   |
| VAS score                            |                                                       |                                                           |                                                        | 0.553   |
| Unmeasured or missing [n(%)]         | 25(14.6)                                              | 25(14.6)                                                  | 37(21.8)                                               |         |
| 0 Point                              | 74 (43.3)                                             | 74(43.3)                                                  | 69(40.6)                                               |         |

medRxiv preprint doi: <https://doi.org/10.1101/2024.11.12.24317154>; this version posted November 13, 2024. The copyright holder for this preprint (which was not certified by peer review) is the author/funder, who has granted medRxiv a license to display the preprint in perpetuity. It is made available under a [CC-BY 4.0 International license](https://creativecommons.org/licenses/by/4.0/).

|         |          |          |          |  |
|---------|----------|----------|----------|--|
| 1 point | 27(15.8) | 30(17.5) | 21(12.4) |  |
| 2 point | 27(15.8) | 24(14.0) | 30(17.6) |  |
| 3 point | 18(10.5) | 18(10.5) | 13(7.6)  |  |

Table 2: Comparison of Primary and Secondary outcome between the three groups

| Outcomes                 | AUC <sub>FIO2</sub> (OR, 95%CI) |                    |                    |
|--------------------------|---------------------------------|--------------------|--------------------|
|                          | AUC<8720% min                   | 8720%min           | AUC>13800% min     |
| <b>Postoperative AKI</b> |                                 |                    |                    |
| One-factor model         | 1.00 (Reference)                | 0.50 (0.32 ~ 0.78) | 0.34 (0.22 ~ 0.53) |
| Multi-factor model*      | 1.00 (Reference)                | 0.58 (0.32 ~ 1.07) | 0.60 (0.23 ~ 1.54) |
| <b>ED</b>                |                                 |                    |                    |
| One-factor model         | 1.00 (Reference)                | 1.17 (0.72 ~ 1.90) | 0.76 (0.46 ~ 1.28) |
| Multi-factor model*      | 1.00 (Reference)                | 1.40 (0.71 ~ 2.74) | 1.52 (0.51 ~ 4.52) |

Table 3 Correlation analysis of AUC<sub>FIO2</sub> and postoperative AKI and ED

\* Correcting factors: Postoperative infection、 Operation site、 Duration of Surgery、 Extubation time、 Hemoglobin、 Body mass index、 Age、 Blood loss、 Crystalloid、 RBC transfusion、 FFP transfusion

# Correcting factors: Postoperative infection, Operation site, Duration of Surgery, Extubation time, Hemoglobin, Body mass index, Age, Blood loss, Crystalloid、 RBC transfusion、 FFP transfusion、 AKI
